# Supplementary material for: The Gut Microbiome Correlated to Chemotherapy Efficacy in Diffuse Large B-Cell Lymphoma Patients
Source: MDPI journal article supplement (doi:10.3390/hematolrep16010007), 2024-01-22
Supplement: s1 [file s1]

## Supplementary Material

The Gut Microbiome Correlated to Chemotherapy Efficacy in Diffuse Large B-cell Lymphoma Patients

Zhuo-Fan XU<sup>1,4†</sup>, Li YUAN<sup>1†</sup>, Yan ZHANG<sup>1</sup>, Wei ZHANG<sup>1</sup>, Chong WEI<sup>1</sup>, Wei WANG<sup>1</sup>, Danqing ZHAO<sup>1</sup>, Daobin ZHOU<sup>1,3\*</sup>, Jingnan LI<sup>2</sup>

\*Correspondence: Daobin ZHOU: zhoudb@pumch.cn

### 1 Supplementary Figures and Tables

#### 1.1 Supplementary Figures

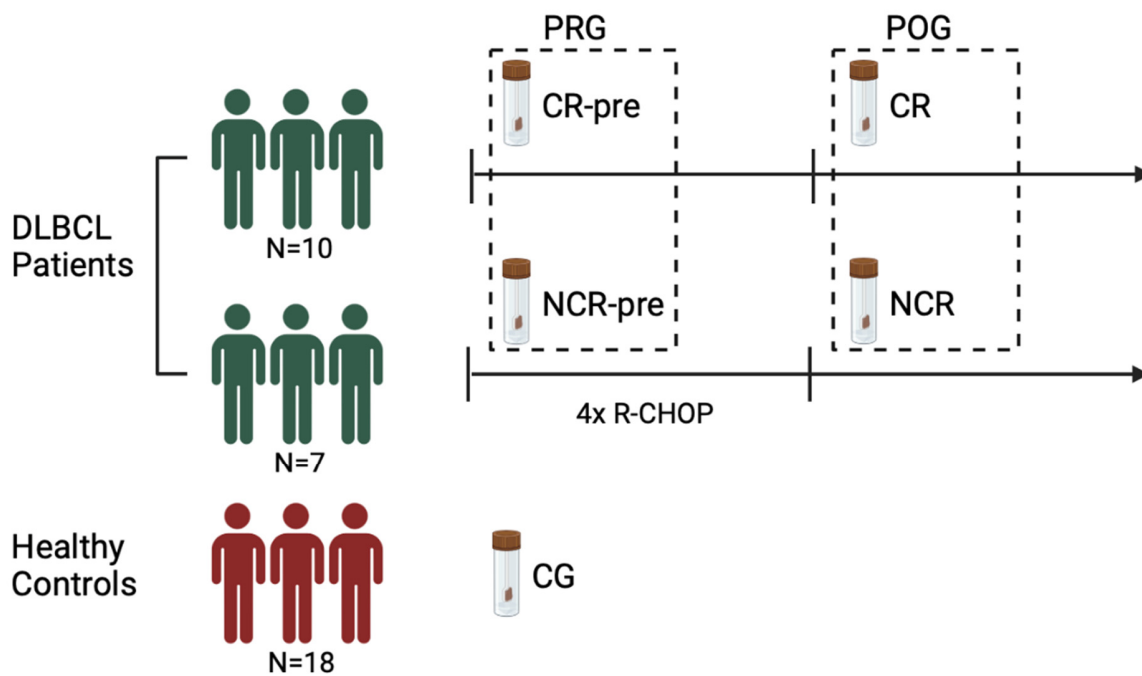

Supplementary Figure S1. Schematic outline of the study design.

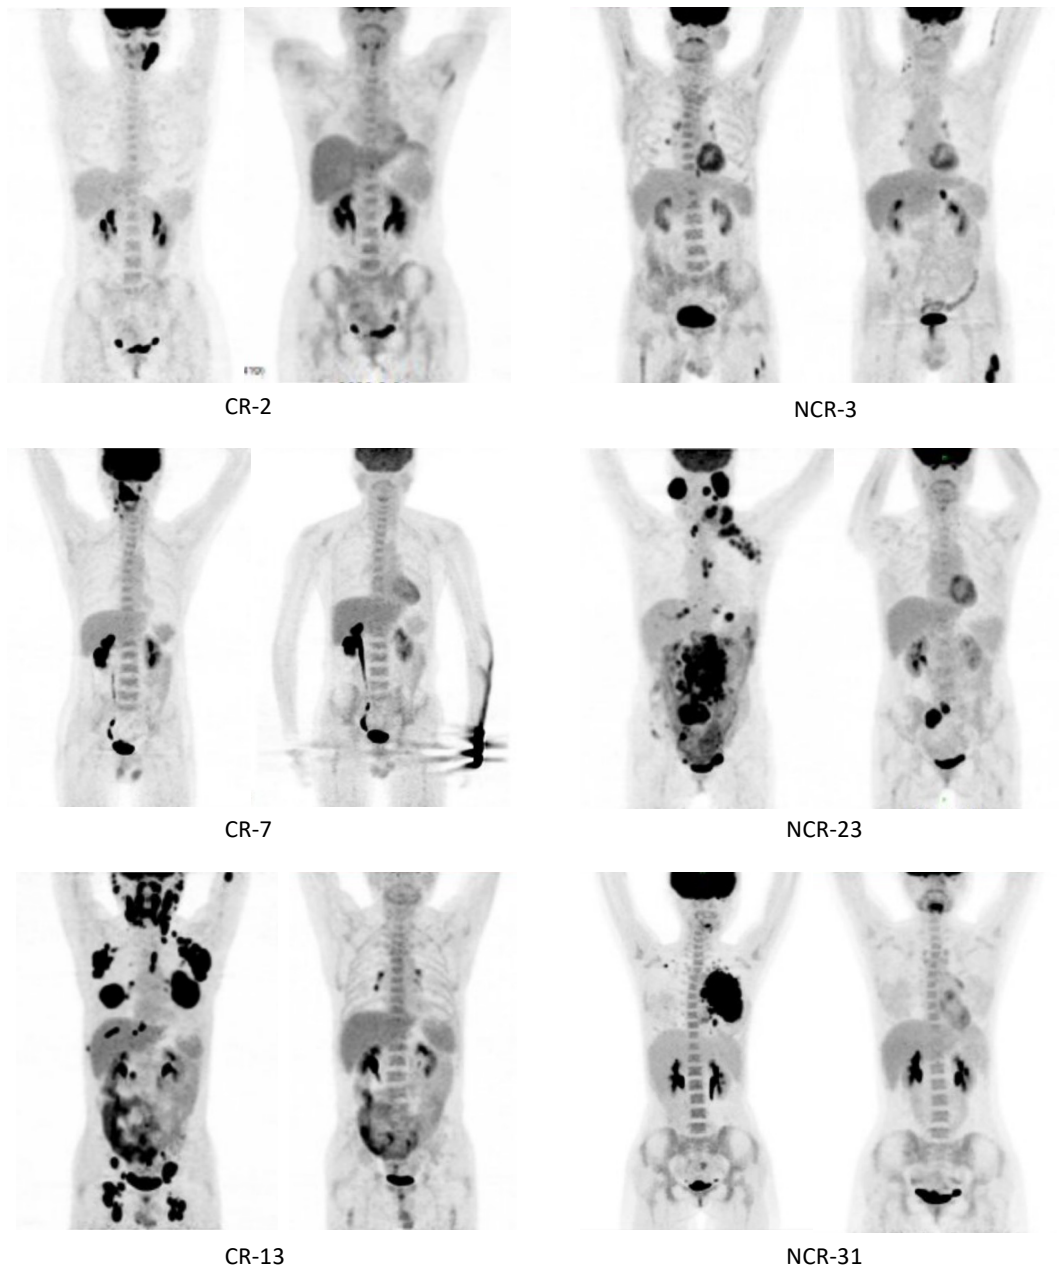

**Supplementary Figure S2.** PET/CT images of CR/NCR patients. For each patient, left: pre-treatment, right: post-treatment (4x R-CHOP)

A.

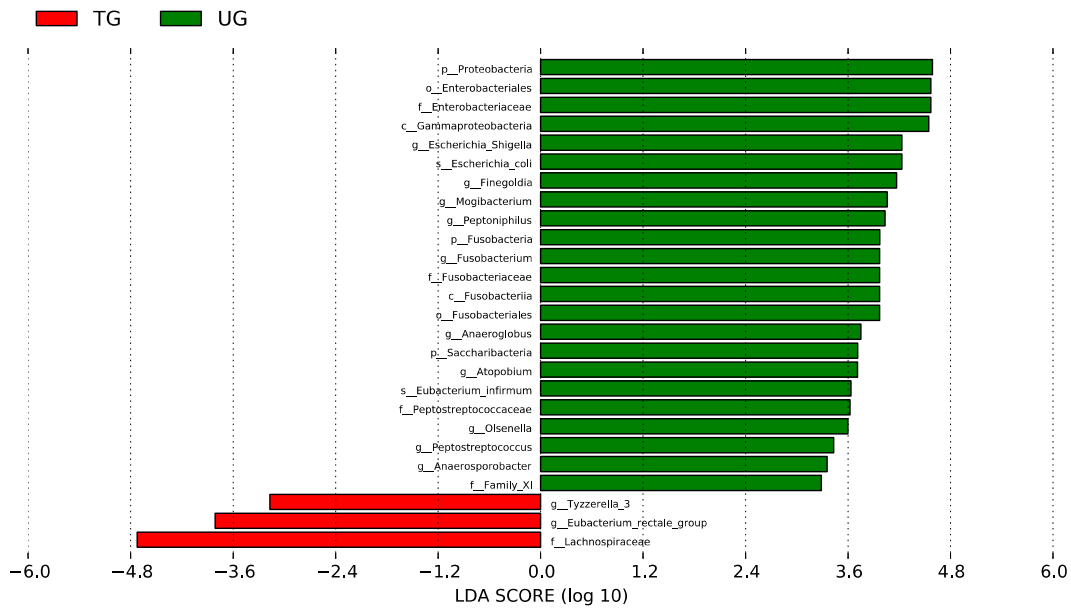

B.

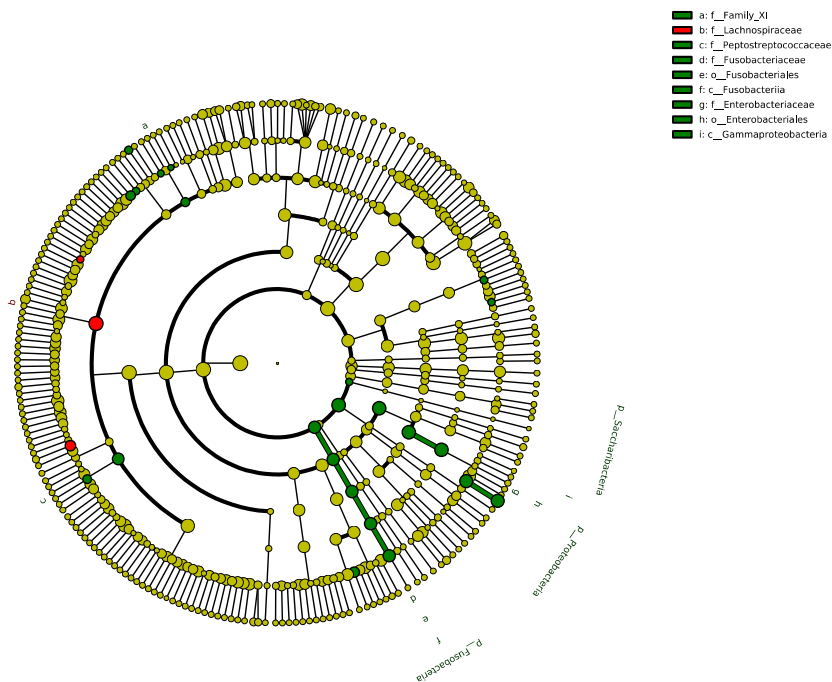

**Supplementary Figure S3.** GMB composition of untreated patients, and treated patients. (UG: untreated patients, TG: treated patients.) A: LEfSe analysis of taxa abundance, UG vs. TG. B: Cladogram, UG vs. TG.

## Supplementary Material

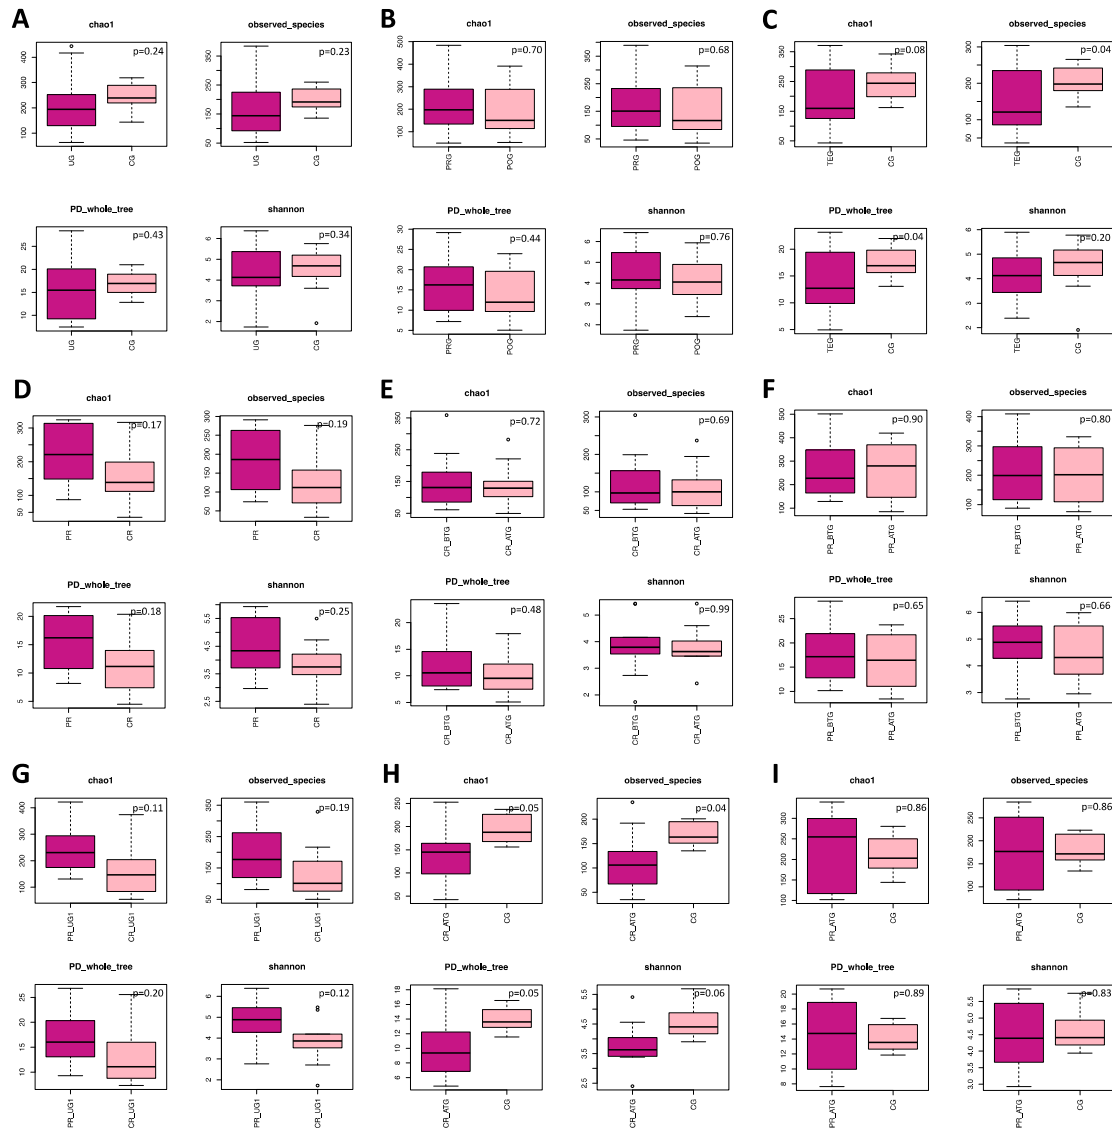

**Supplementary Figure S4. A-I:** The  $\alpha$ -diversity analysis of each pair of groups. The p-values by Turkey-group-test were indicated in the figures.

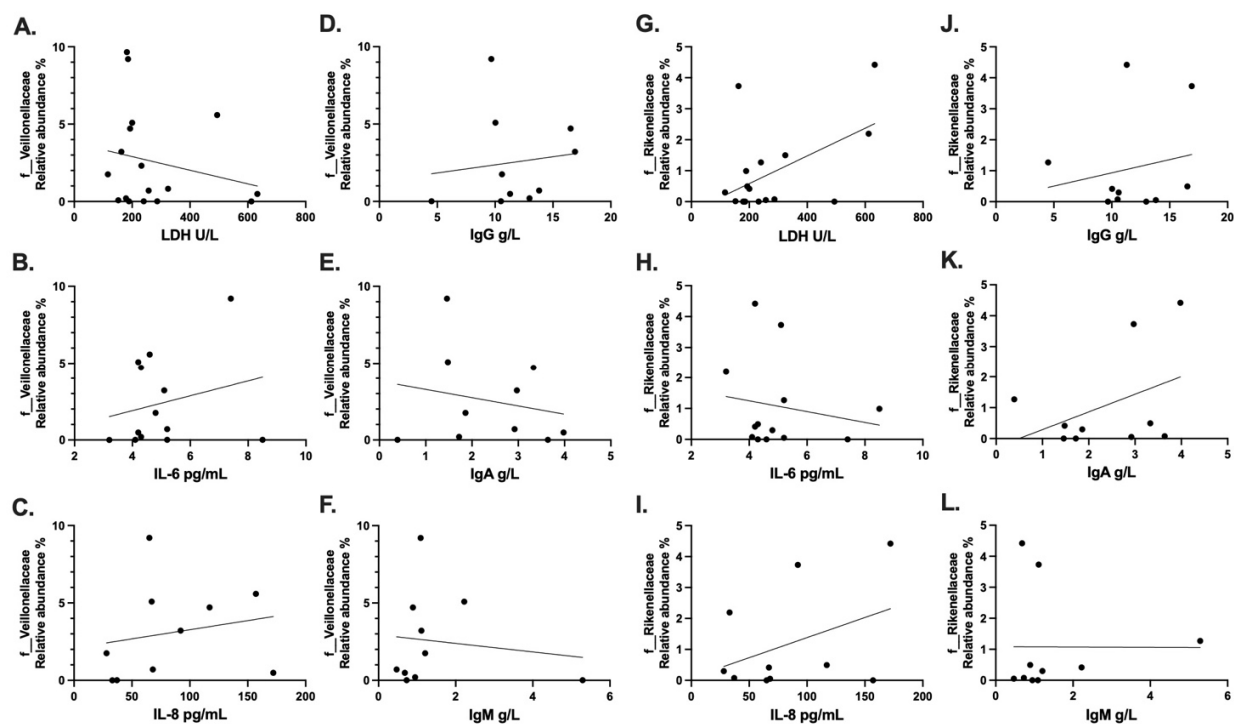

**Supplementary Figure S5.** A-F: The correlations of serum inflammation markers/immunology markers (LDH, IL-6, IL-8, IgG, IgA, IgM) and relative abundance of *Veillonellaceae*. G-L: The correlations of serum inflammation markers/immunology markers (LDH, IL-6, IL-8, IgG, IgA, IgM) and relative abundance of *Rikenellaceae*.

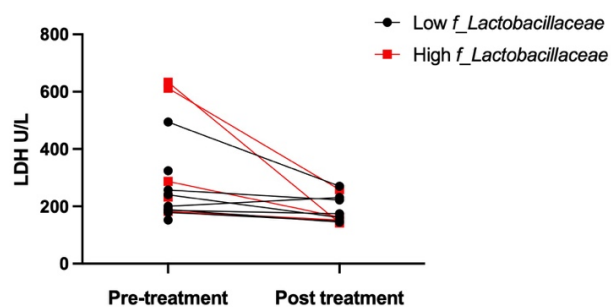

**Supplementary Figure S6.** The serum LDH level before and after treatment. Patients with high *Lactobacillaceae* abundance (post-treatment) was labeled red color.

## 1.2 Supplementary Tables

Supplementary Table S1. Virulence factors of *E.coli* in PRG vs. CG

| Virulence factors                 | Gene             | p value | Function                                        |
|-----------------------------------|------------------|---------|-------------------------------------------------|
| <b>Adhesins</b>                   | <i>fimH</i>      | 0.036   | d-Mannose-specific adhesin                      |
|                                   | <i>bfpA</i>      | 0.057   | Type IV bundle-forming pili                     |
|                                   | <i>focG</i>      | 0.086   | Pilus tip molecule                              |
|                                   | <i>fliC</i>      | 0.100   | Flagellin variant                               |
|                                   | <i>aidA</i>      | 0.317   | Adhesin involved in diffuse adherence           |
|                                   | <i>papC</i>      | 0.346   | Pilus assembly                                  |
|                                   | <i>fasA</i>      | 0.584   | F6 fimbrial adhesin                             |
|                                   | <i>papG</i>      | 0.681   | Gal(1-4)Gal-specific pilus tip adhesin molecule |
|                                   | <i>papA</i>      | 0.774   | Major structural subunit of pilus               |
|                                   | <i>papEF</i>     | 0.895   | Minor tip pilins                                |
| <b>Capsule synthesis</b>          | <i>rfc</i>       | 0.348   | O4 lipopolysaccharide synthesis                 |
| <b>Toxins</b>                     | <i>vat</i>       | 0.033   | vacuolating toxin                               |
|                                   | <i>astA</i>      | 0.052   | Enterotoxigenic E.coli toxin                    |
|                                   | <i>hlyD</i>      | 0.057   | Hemolysin                                       |
|                                   | <i>hlyA</i>      | 0.287   | Hemolysin                                       |
|                                   | <i>east1</i>     | 0.348   | Heat-stable enterotoxin                         |
|                                   | <i>clbB/clbN</i> | 0.348   | Colibactin                                      |
|                                   | <i>cvaC</i>      | 0.401   | Colicin V                                       |
|                                   | <i>sat</i>       | 0.695   | Secreted autotransporter toxin                  |
| <b>Siderophores</b>               | <i>fyuA</i>      | 0.032   | yersiniabactin receptor                         |
|                                   | <i>iroN</i>      | 0.057   | Novel catecholate siderophore                   |
| <b>Additional virulence genes</b> | <i>malX</i>      | 0.005   | Pathogenicity island marker                     |
|                                   | <i>traT</i>      | 0.022   | Serum survival                                  |
|                                   | <i>usp</i>       | 0.022   | Uropathogen-specific protein                    |
|                                   | <i>ompT</i>      | 0.339   | Outer membrane protease                         |
|                                   | <i>PAI</i>       | 0.844   | Pathogenicity-associated island                 |

**Supplementary Table S2.** Exopolysaccharides synthesis pathway in *Lactobacillus* in CR vs. NCR

| EPS Pathway       | Gene             | p value | Function                                    |
|-------------------|------------------|---------|---------------------------------------------|
| <b>Protease</b>   | <i>prtD</i>      | 0.103   | Protease                                    |
|                   | <i>pepN</i>      | 0.560   | Peptidase                                   |
| <b>Regulation</b> | <i>lytR/epsA</i> | 0.711   | Transcriptional regulation of EPS synthesis |
| <b>Synthesis</b>  | <i>epsB</i>      | 0.175   | Tyrosine kinase modulator                   |
|                   | <i>epsC</i>      | 0.257   | Tyrosine kinase                             |
|                   | <i>epsD</i>      | 0.870   | Phosphotyrosine phosphatase                 |
|                   | <i>epsE</i>      | 0.158   | Priming glycosyltransferase                 |
|                   | <i>epsF</i>      | 0.036   | Unknown                                     |
|                   | <i>wzx</i>       | 0.168   | Flippase                                    |
|                   | <i>wzy</i>       | 0.087   | Polysaccharide polymerase                   |
| <b>Export</b>     | <i>epsG</i>      | 0.543   | Putative membrane protein                   |
|                   | <i>dppA</i>      | 0.063   | Transporter protein                         |
